# Supplementary material
Source: Research Square preprint supplement (doi:10.21203/rs.3.rs-9246652/v1)
Supplement: Supplementary file 1 [file 46b8acc1a05eadb764ca0648.xlsx]

## Sheet: TableS1
		All sample		HUGJT		HSC			HCV test negative		HCV test positive			Active HCV test negative		Active HCV test positive			HBV test negative		HBV test positive
	Quantitative parameters	N	Median [1st Q - 3rd Q]	N	Median [1st Q - 3rd Q]	N	Median [1st Q - 3rd Q]	Pvalue	N	Median [1st Q - 3rd Q]	N	Median [1st Q - 3rd Q]	Pvalue	N	Median [1st Q - 3rd Q]	N	Median [1st Q - 3rd Q]	Pvalue	N	Median [1st Q - 3rd Q]	N	Median [1st Q - 3rd Q]	Pvalue
	Age (years)	1998	62.00 [44.00 - 76.00]	1695	63.00 [45.00 - 77.00]	303	59.00 [40.00 - 74.00]	0.0112116	1959	62.00 [44.00 - 76.00]	39	63.00 [57.5 - 67.00]	0.289109	1988	62.50 [44.00 - 76.00]	10	60.00 [53.5 - 75.25]	0.747395	1983	62.00 [44.00 - 76.00]	15	58.00 [40.5 - 70.50]	0.34988
	Body mass-index (ratio)	1998	26.23 [23.00 - 29.83]	1695	26.22 [22.88 - 29.80]	303	26.64 [23.34 - 30.11]	0.2344	1959	26.28 [23.01 - 29.93]	39	24.02 [20.88 - 27.57]	0.014619	1988	26.23 [23.01 - 29.86]	10	21.44 [20.88 - 22.80]	0.0144162	1983	26.25 [23.01 - 29.86]	15	22.42 [21.57 - 24.83]	0.22288
	Categorical parameters	N	%	N	%	N	%	Pvalue	N	%	N	%	Pvalue	N	%	N	%	Pvalue	N	%	N	%	Pvalue
	Age <30	238	11.9119	194	11.4454	44	14.5215		237	99.5798	1	0.420168		237	99.5798	1	0.420168		235	98.7395	3	1.2605
	Age 30-39	169	8.45846	135	7.9646	34	11.2211		168	99.4083	1	0.591716		169	100	0	0		168	99.4083	1	0.591716
	Age 40-49	256	12.8128	216	12.7434	40	13.2013		253	98.8281	3	1.17188		255	99.6094	1	0.390625		254	99.2188	2	0.78125
	Age 50-59	260	13.013	220	12.9794	40	13.2013		250	96.1538	10	3.84615		257	98.8462	3	1.15385		258	99.2308	2	0.769231
	Age 60-69	349	17.4675	303	17.8761	46	15.1815		334	95.702	15	4.29799		348	99.7135	1	0.286533		346	99.1404	3	0.859599
	Age 70-79	386	19.3193	326	19.233	60	19.802		381	98.7047	5	1.29534		384	99.4819	2	0.518135		383	99.2228	3	0.777202
	Age 80-89	261	13.0631	230	13.5693	31	10.231		259	99.2337	2	0.766284		260	99.6169	1	0.383142		260	99.6169	1	0.383142
	Age >90	79	3.95395	71	4.18879	8	2.64026	0.178611	77	97.4684	2	2.53165	0.00157179	78	98.7342	1	1.26582	0.721173	79	100	0	0	0.958624
	Masculine	909	45.4955	769	45.3687	140	46.2046		898	98.7899	11	1.21012		906	99.67	3	0.330033		904	99.4499	5	0.550055
	Feminine	1089	54.5045	926	54.6313	163	53.7954	0.836401	1061	97.4288	28	2.57117	0.0426126	1082	99.3572	7	0.642792	0.50402	1079	99.0817	10	0.918274	0.490658
	Born in Spain	1583	79.2292	1358	80.118	225	74.2574		1549	97.8522	34	2.14782		1574	99.4315	9	0.568541		1576	99.5578	7	0.442198
	Born outside Spain	330	16.5165	260	15.3392	70	23.1023	0.00181744	325	98.4848	5	1.51515	0.5991	329	99.697	1	0.30303	0.850211	322	97.5758	8	2.42424	0.00075065
	Born in Spain	1583	79.2292	1358	80.118	225	74.2574		1549	97.8522	34	2.14782		1574	99.4315	9	0.568541		1576	99.5578	7	0.442198
	Born in North Africa	90	4.5045	63	3.71681	27	8.91089		88	97.7778	2	2.22222		90	100	0	0		88	97.7778	2	2.22222
	Born in South Saharan Africa	45	2.25225	28	1.65192	17	5.61056		45	100	0	0		45	100	0	0		40	88.8889	5	11.1111
	Born in Centre America	57	2.85285	48	2.83186	9	2.9703		57	100	0	0		57	100	0	0		57	100	0	0
	Born in South America	49	2.45245	42	2.47788	7	2.31023		49	100	0	0		49	100	0	0		49	100	0	0
	Born in Est Europe	49	2.45245	45	2.65487	4	1.32013		47	95.9184	2	4.08163		49	100	0	0		48	97.9592	1	2.04082
	Born in West Europe	26	1.3013	24	1.41593	2	0.660066		26	100	0	0		26	100	0	0		26	100	0	0
	Born in Est Asia	11	0.550551	7	0.412979	4	1.32013		10	90.9091	1	9.09091		10	90.9091	1	9.09091		11	100	0	0
	Born in West Asia	2	0.1001	2	0.117994	0	0	1.45108e-06	2	100	0	0	0.373811	2	100	0	0	0.0299996	2	100	0	0	5.37084e-12
	European ancestry	1660	83.0831	1430	84.3658	230	75.9076		1624	97.8313	36	2.16867		1651	99.4578	9	0.542169		1652	99.5181	8	0.481928
	African ancestry	192	9.60961	142	8.37758	50	16.5017		190	98.9583	2	1.04167		192	100	0	0		185	96.3542	7	3.64583
	Asian ancestry	13	0.650651	9	0.530973	4	1.32013		12	92.3077	1	7.69231		12	92.3077	1	7.69231		13	100	0	0
	American ancestry	124	6.20621	106	6.25369	18	5.94059		124	100	0	0		124	100	0	0		124	100	0	0
	Oceanic ancestry	1	0.0500501	1	0.0589971	0	0	0.000156836	1	100	0	0	0.203567	1	100	0	0	0.00451061	1	100	0	0	7.43738e-05
	Ever drink alcohol	412	20.6206	351	20.708	61	20.132		394	95.6311	18	4.36893		407	98.7864	5	1.21359		408	99.0291	4	0.970874
	Never drunk alcohol	1586	79.3794	1344	79.292	242	79.868	0.879853	1565	98.6759	21	1.32409	0.000156559	1581	99.6847	5	0.315259	0.0560913	1575	99.3064	11	0.693569	0.794352
	Current drinker	245	12.2623	213	12.5664	32	10.5611		236	96.3265	9	3.67347		241	98.3673	4	1.63265		243	99.1837	2	0.816327
	Former drinker	166	8.30831	137	8.0826	29	9.57096		157	94.5783	9	5.42169		165	99.3976	1	0.60241		164	98.7952	2	1.20482
	Never drunk alcohol	1586	79.3794	1344	79.292	242	79.868	0.463395	1565	98.6759	21	1.32409	0.000158912	1581	99.6847	5	0.315259	0.024359	1575	99.3064	11	0.693569	0.762312
	Current cigarettes smoker	426	21.3213	356	21.0029	70	23.1023		411	96.4789	15	3.52113		422	99.061	4	0.938967		422	99.061	4	0.938967
	Former cigarettes smoker	477	23.8739	410	24.1888	67	22.1122		463	97.065	14	2.93501		474	99.3711	3	0.628931		473	99.1614	4	0.838574
	Never smoked cigarettes	1095	54.8048	929	54.8083	166	54.7855	0.607848	1085	99.0868	10	0.913242	0.000883869	1092	99.726	3	0.273973	0.230974	1088	99.3607	7	0.639269	0.804708
	Smoking <1 pack/day	309	15.4655	257	15.1622	52	17.1617		297	96.1165	12	3.8835		307	99.3528	2	0.647249		305	98.7055	4	1.2945
	Smoking ~1 pack/day	82	4.1041	70	4.12979	12	3.9604		80	97.561	2	2.43902		80	97.561	2	2.43902		82	100	0	0
	Smoking >1 pack/day	35	1.75175	29	1.71091	6	1.9802	0.886358	34	97.1429	1	2.85714	0.799514	35	100	0	0	0.272783	35	100	0	0	0.465585
	Ever smoke cannabis	94	4.7047	82	4.83776	12	3.9604		87	92.5532	7	7.44681		91	96.8085	3	3.19149		93	98.9362	1	1.06383
	Never smoked cannabis	1902	95.1952	1611	95.0442	291	96.0396	0.60233	1870	98.3176	32	1.68244	0.000370974	1895	99.632	7	0.368034	0.00239324	1888	99.2639	14	0.736067	1
	Current cannabis smoker	62	3.1031	57	3.36283	5	1.65017		57	91.9355	5	8.06452		60	96.7742	2	3.22581		61	98.3871	1	1.6129
	Former cannabis smoker	31	1.55155	24	1.41593	7	2.31023		29	93.5484	2	6.45161		30	96.7742	1	3.22581		31	100	0	0
	Never smoke cannabis	1905	95.3453	1614	95.2212	291	96.0396	0.151613	1873	98.3202	32	1.67979	0.000315788	1898	99.6325	7	0.367454	0.000693504	1891	99.2651	14	0.734908	0.650702
	Ever taken cocaine	75	3.75375	64	3.77581	11	3.63036		67	89.3333	8	10.6667		73	97.3333	2	2.66667		74	98.6667	1	1.33333
	Never taken cocaine	1922	96.1962	1630	96.1652	292	96.3696	1	1891	98.3871	31	1.6129	2.84284e-07	1914	99.5838	8	0.416233	0.060796	1908	99.2716	14	0.728408	1
	Current cocaine intake	36	1.8018	31	1.82891	5	1.65017		33	91.6667	3	8.33333		35	97.2222	1	2.77778		36	100	0	0
	Former cocaine intake	39	1.95195	33	1.9469	6	1.9802		34	87.1795	5	12.8205		38	97.4359	1	2.5641		38	97.4359	1	2.5641
	Never taken cocaine	1923	96.2462	1631	96.2242	292	96.3696	0.976479	1892	98.3879	31	1.61206	7.20421e-08	1915	99.584	8	0.416017	0.025229	1909	99.272	14	0.728029	0.366642
	Ever taken heroin	16	0.800801	15	0.884956	1	0.330033		10	62.5	6	37.5		13	81.25	3	18.75		16	100	0	0
	Never taken heroin	1977	98.9489	1675	98.8201	302	99.67	0.514459	1944	98.3308	33	1.6692	5.47496e-21	1970	99.6459	7	0.354072	8.24746e-18	1962	99.2413	15	0.758725	1
	Current heroin intake	7	0.35035	7	0.412979	0	0		5	71.4286	2	28.5714		6	85.7143	1	14.2857		7	100	0	0
	Former heroin intake	9	0.45045	8	0.471976	1	0.330033		5	55.5556	4	44.4444		7	77.7778	2	22.2222		9	100	0	0
	Never taken heroin	1981	99.1491	1679	99.056	302	99.67	0.502727	1948	98.3342	33	1.66583	5.78166e-25	1974	99.6466	7	0.353357	3.22322e-25	1966	99.2428	15	0.757193	0.940791
	Ever taken GHB	16	0.800801	14	0.825959	2	0.660066		16	100	0	0		16	100	0	0		16	100	0	0
	Never taken GHB	1978	98.999	1677	98.9381	301	99.3399	1	1939	98.0283	39	1.97169	1	1968	99.4944	10	0.505561	1	1963	99.2417	15	0.758342	1
	Current GHB intake	4	0.2002	4	0.235988	0	0		4	100	0	0		4	100	0	0		4	100	0	0
	Former GHB intake	12	0.600601	10	0.589971	2	0.660066		12	100	0	0		12	100	0	0		12	100	0	0
	Never taken GHB	1979	99.049	1678	98.9971	301	99.3399	0.69163	1940	98.0293	39	1.97069	0.851463	1969	99.4947	10	0.505306	0.960186	1964	99.242	15	0.757959	0.940733
	Ever taken ketamine	9	0.45045	7	0.412979	2	0.660066		9	100	0	0		9	100	0	0		9	100	0	0
	Never taken ketamine	1979	99.049	1678	98.9971	301	99.3399	0.905094	1940	98.0293	39	1.97069	1	1969	99.4947	10	0.505306	1	1964	99.242	15	0.757959	1
	Current ketamine intake	3	0.15015	3	0.176991	0	0		3	100	0	0		3	100	0	0		3	100	0	0
	Former ketamine intake	6	0.3003	4	0.235988	2	0.660066		6	100	0	0		6	100	0	0		6	100	0	0
	Never taken ketamine	1978	98.999	1677	98.9381	301	99.3399	0.357071	1939	98.0283	39	1.97169	0.913472	1968	99.4944	10	0.505561	0.977394	1963	99.2417	15	0.758342	0.966199
	Ever taken methamphetamine	15	0.750751	13	0.766962	2	0.660066		14	93.3333	1	6.66667		14	93.3333	1	6.66667		15	100	0	0
	Never taken methamphetamine	1971	98.6486	1671	98.5841	300	99.0099	1	1934	98.1228	37	1.87722	0.686983	1963	99.5941	8	0.405885	0.0954932	1956	99.239	15	0.761035	1
	Current methamphetamine intake	6	0.3003	6	0.353982	0	0		6	100	0	0		6	100	0	0		6	100	0	0
	Former methamphetamine intake	9	0.45045	7	0.412979	2	0.660066		8	88.8889	1	11.1111		8	88.8889	1	11.1111		9	100	0	0
	Never taken methamphetamine	1980	99.0991	1680	99.115	300	99.0099	0.491105	1942	98.0808	38	1.91919	0.130716	1971	99.5455	9	0.454545	3.66089e-05	1965	99.2424	15	0.757576	0.944359
	Ever had STD	70	3.5035	51	3.00885	19	6.27063		67	95.7143	3	4.28571		69	98.5714	1	1.42857		67	95.7143	3	4.28571
	Never had STD	1914	95.7958	1632	96.2832	282	93.0693	0.00751808	1879	98.1714	35	1.82863	0.303368	1906	99.582	8	0.417973	0.741089	1902	99.373	12	0.626959	0.00562989
	Currently have STD	37	1.85185	25	1.47493	12	3.9604		34	91.8919	3	8.10811		36	97.2973	1	2.7027		34	91.8919	3	8.10811
	Do not have STD	1952	97.6977	1662	98.0531	290	95.7096	0.00652646	1918	98.2582	34	1.7418	0.0260708	1944	99.5902	8	0.409836	0.410882	1941	99.4365	11	0.563525	8.76568e-06
	Ever had HAV	94	4.7047	74	4.36578	20	6.60066		88	93.617	6	6.38298		93	98.9362	1	1.06383		94	100	0	0
	Never had HAV	1904	95.2953	1621	95.6342	283	93.3993	0.122359	1871	98.2668	33	1.73319	0.00512233	1895	99.5273	9	0.472689	0.964735	1889	99.2122	15	0.787815	0.801205
	Ever had HCV	23	1.15115	23	1.35693	0	0		0	0	23	100		18	78.2609	5	21.7391		23	100	0	0
	Never had HCV	1967	98.4484	1666	98.2891	301	99.3399	0.0812123	1951	99.1866	16	0.813421		1962	99.7458	5	0.254194		1952	99.2374	15	0.762583
	Anti-HCV negative	1959	98.048	1658	97.8171	301	99.3399
	Anti-HCV positive	39	1.95195	37	2.18289	2	0.660066	0.123705
	Active HCV RNA negative	1988	99.4995	1686	99.469	302	99.67
	Active HCV RNA positive	10	0.500501	9	0.530973	1	0.330033	0.988353
	Ever had HBV	22	1.1011	19	1.12094	3	0.990099		20	90.9091	2	9.09091		21	95.4545	1	4.54545		16	72.7273	6	27.2727
	Never had HBV	1967	98.4484	1669	98.4661	298	98.3498	1	1930	98.119	37	1.88104		1958	99.5425	9	0.45755		1958	99.5425	9	0.45755
	HBsAg negative	1983	99.2492	1684	99.351	299	98.6799
	HBsAg positive	15	0.750751	11	0.648968	4	1.32013	0.375989
